# Supplementary material
Source: ML conference proceedings conference paper supplement (https://openreview.net/forum?id=gRmWtOnTLK)
Supplement: supplementary_material [file attachment]

# **G2PE: A SIMPLE PYTHON MODULE FOR ENGLISH GRAPHEME TO PHONEME CONVERSION**

Kyubyong @ Kakao Brain

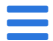

# G2P AND TTS ...

- 
- 

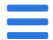

# G2P AND TTS ...

- g2p for TTS
- 

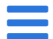

# G2P AND TTS ...

- g2p for TTS
- Do g2p modules really help for TTS?



# ISSUES

- 
- 
- 
- 
- 
- 
- 
- 



# ISSUES

- heteronyms such as lead, minute, refuse
- 
- 
- 
- 
- 
- 
- 
- 



# ISSUES

- heteronyms such as lead, minute, refuse
- numbers
- 
- 
- 
- 
- 
- 
- 

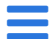

# ISSUES

- heteronyms such as lead, minute, refuse
- numbers
- symbols
- 
- 
- 
- 
- 





# ISSUES

- heteronyms such as lead, minute, refuse
- numbers
- symbols
- foreign letters
- 
- 
- 
- 



# ISSUES

- heteronyms such as lead, minute, refuse
- numbers
- symbols
- foreign letters
- phonetic vs. phonemic
- 
- 
- 



# ISSUES

- heteronyms such as lead, minute, refuse
- numbers
- symbols
- foreign letters
- phonetic vs. phonemic
- Often heteronyms can be disambiguated with their POS.
- 
- 



# ISSUES

- heteronyms such as lead, minute, refuse
- numbers
- symbols
- foreign letters
- phonetic vs. phonemic
- Often heteronyms can be disambiguated with their POS.
- But, not always: bass (fish) vs. bass (instrument)
- 



# ISSUES

- heteronyms such as lead, minute, refuse
- numbers
- symbols
- foreign letters
- phonetic vs. phonemic
- Often heteronyms can be disambiguated with their POS.
- But, not always: bass (fish) vs. bass (instrument)
- Machine learning can help but be expensive.

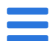

# UNIVERSAL ALPHABETS

- 
- 
- 
- 



# UNIVERSAL ALPHABETS

- IPA: diacritics
- 
- 
- 



# UNIVERSAL ALPHABETS

- IPA: diacritics
- APA: ascii
- 
- 





# UNIVERSAL ALPHABETS

- IPA: diacritics
- APA: ascii
- SAMPA
- 



# UNIVERSAL ALPHABETS

- IPA: diacritics
- APA: ascii
- SAMPA
- X-SAMPA



# ENGLISH PRONUNCIATION DICTIONARIES

- 

- 

- 

- 



# ENGLISH PRONUNCIATION DICTIONARIES

- CMU pronouncing dictionary: North American English
- 
- 
- 

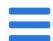

# ENGLISH PRONUNCIATION DICTIONARIES

- CMU pronouncing dictionary: North American English
- wiktionary (cf.  
[[https://github.com/Kyubyong/pron\\_dictionaries](https://github.com/Kyubyong/pron_dictionaries)])
- 
- 



# ENGLISH PRONUNCIATION DICTIONARIES

- CMU pronouncing dictionary: North American English
- wiktionary (cf.  
[[https://github.com/Kyubyong/pron\\_dictionaries](https://github.com/Kyubyong/pron_dictionaries)])
- GB or other regional English?
- 

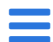

# ENGLISH PRONUNCIATION DICTIONARIES

- CMU pronouncing dictionary: North American English
- wiktionary (cf. [\[https://github.com/Kyubyong/pron\\_dictionaries\]](https://github.com/Kyubyong/pron_dictionaries))
- GB or other regional English?
- Can you really predict how one reads?



# ALGORITHM

- 
- 
- 
- 
- 
- 

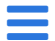



# ALGORITHM

- 0. Spell out Arabic numbers and symbols
- 
- 
- 
- 
- 



# ALGORITHM

- 0. Spell out Arabic numbers and symbols
- 1. Pos tagging with nltk
- 
- 
- 
- 



# ALGORITHM

- 0. Spell out Arabic numbers and symbols
- 1. Pos tagging with nltk
- 2. Disambiguate heteronyms using 1.
- 
- 
- 



# ALGORITHM

- 0. Spell out Arabic numbers and symbols
- 1. Pos tagging with nltk
- 2. Disambiguate heteronyms using 1.
- 3. Look up the dictionary
- 
- 



# ALGORITHM

- 0. Spell out Arabic numbers and symbols
- 1. Pos tagging with nltk
- 2. Disambiguate heteronyms using 1.
- 3. Look up the dictionary
- 4. For OOVs, predict with neural networks
- 



# ALGORITHM

- 0. Spell out Arabic numbers and symbols
- 1. Pos tagging with nltk
- 2. Disambiguate heteronyms using 1.
- 3. Look up the dictionary
- 4. For OOVs, predict with neural networks
- how important?



# PREDICTION MODEL

- 
- 
- 
- 
- 
- 
- 



# PREDICTION MODEL

- Encode with a GRU layer
- 
- 
- 
- 
- 
- 





# PREDICTION MODEL

- Encode with a GRU layer
- Decode with another GRU layer
- 
- 
- 
- 
- 



# PREDICTION MODEL

- Encode with a GRU layer
- Decode with another GRU layer
- Start decoding from the last hidden values of the encoder
- 
- 
- 
- 



# PREDICTION MODEL

- Encode with a GRU layer
- Decode with another GRU layer
- Start decoding from the last hidden values of the encoder
- Model size: 3.2M
- 
- 
- 



# PREDICTION MODEL

- Encode with a GRU layer
- Decode with another GRU layer
- Start decoding from the last hidden values of the encoder
- Model size: 3.2M
- num. parameters: 834k
- 
- 



# PREDICTION MODEL

- Encode with a GRU layer
- Decode with another GRU layer
- Start decoding from the last hidden values of the encoder
- Model size: 3.2M
- num. parameters: 834k
- Train in PyTorch
- 

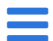

# PREDICTION MODEL

- Encode with a GRU layer
- Decode with another GRU layer
- Start decoding from the last hidden values of the encoder
- Model size: 3.2M
- num. parameters: 834k
- Train in PyTorch
- Infer in NumPy to avoid the dependence on pytorch

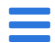

# TRIVIA

- 

- 

- 

- 

- 

- 

- 



# TRIVIA

- You need to extract correct last vectors of rnns (cf. [here](#))

- 

- 

- 

- 

- 

- 





# TRIVIA

- You need to extract correct last vectors of rnns (cf. [here](#))
- Decode with another GRU layer
- 
- 
- 
- 
- 



# TRIVIA

- You need to extract correct last vectors of rnns (cf. [here](#))
- Decode with another GRU layer
- Start decoding from the last hidden values of the encoder
- 
- 
- 
- 



# TRIVIA

- You need to extract correct last vectors of rnns (cf. [here](#))
- Decode with another GRU layer
- Start decoding from the last hidden values of the encoder
- Model size: 3.2M
- 
- 
- 



# TRIVIA

- You need to extract correct last vectors of rnns (cf. [here](#))
- Decode with another GRU layer
- Start decoding from the last hidden values of the encoder
- Model size: 3.2M
- num. parameters: 834k
- 
- 



# TRIVIA

- You need to extract correct last vectors of rnns (cf. [here](#))
- Decode with another GRU layer
- Start decoding from the last hidden values of the encoder
- Model size: 3.2M
- num. parameters: 834k
- [Train in PyTorch](#)
- 



# TRIVIA

- You need to extract correct last vectors of rnns (cf. [here](#))
- Decode with another GRU layer
- Start decoding from the last hidden values of the encoder
- Model size: 3.2M
- num. parameters: 834k
- [Train in PyTorch](#)
- [Infer in NumPy](#) to avoid the dependence on
